# Supplementary material for: Intravenous or subcutaneous natalizumab in patients with relapsing–remitting multiple sclerosis: investigation on efficiency and savings—the EASIER study
Source: Springer Nature journal article supplement (doi:10.1007/s00415-023-11955-0), 2023-09-16
Supplement: MOESM1 [file 26050636]

## Intravenous or Subcutaneous Natalizumab in Patients with Relapsing Remitting Multiple Sclerosis: Investigation on Efficiency and Savings—The EASIER Study

Massimo Filippi<sup>1,2</sup>, Luigi Grimaldi<sup>3</sup>, Antonella Conte<sup>4,5,6</sup>, Rocco Totaro<sup>7</sup>, Maria Rosaria Valente<sup>8</sup>, Simona Malucchi<sup>9</sup>, Franco Granella<sup>10</sup>, Cinzia Cordioli<sup>11</sup>, Vincenzo Brescia Morra<sup>12</sup>, Chiara Zanetta<sup>1</sup>, Daria Perini<sup>13</sup>, Laura Santoni<sup>13</sup>; on behalf of the EASIER study working group

<sup>1</sup>Neurology Unit, Neurorehabilitation Unit, Neurophysiology Service, and Neuroimaging Research Unit, Division of Neuroscience, IRCCS San Raffaele Scientific Institute, Milan, Italy; <sup>2</sup>Vita-Salute San Raffaele University, Milan, Italy; <sup>3</sup>Multiple Sclerosis Center, Fondazione Istituto G. Giglio, Cefalù (PA), Italy; <sup>4</sup>Department of Human Neurosciences, Sapienza, University of Rome, Italy; <sup>5</sup>Multiple Sclerosis Center Policlinico Umberto I Hospital, Rome, Italy; <sup>6</sup>IRCCS Neuromed, Pozzilli (IS), Italy; <sup>7</sup>Demyelinating Disease Center, Department of Neurology, San Salvatore Hospital, L'Aquila, Italy; <sup>8</sup>Clinical Neurology, Santa Maria della Misericordia University Hospital and Department of Medicine, University of Udine, Udine, Italy; <sup>9</sup>SCDO Neurologia, S. Luigi Gonzaga University Hospital, Orbassano (TO), Italy; <sup>10</sup>Department of Medicine and Surgery, University Hospital of Parma, Parma, Italy; <sup>11</sup>Multiple Sclerosis Center, ASST Spedali Civili di Brescia, Montichiari Hospital (Brescia), Italy; <sup>12</sup>Multiple Sclerosis Clinical Care and Research Center, Federico II University Hospital—Department of Neuroscience (NSRO), Naples, Italy; <sup>13</sup>Biogen Italia, Milan, Italy

Corresponding author: Massimo Filippi, filippi.massimo@hsr.it

| Tasks                                          | Description                                                                                                                                                                                                        | Patient time | HCP time | Chair time | Pre - infusion | Post-infusion |
|------------------------------------------------|--------------------------------------------------------------------------------------------------------------------------------------------------------------------------------------------------------------------|--------------|----------|------------|----------------|---------------|
| 1 – Material preparation                       | Material pick-up, except the drug, placement next to the infusion chair                                                                                                                                            |              | X        |            | X              |               |
| 2 – Drug pick-up at the H pharmacy             | Round trip to the hospital pharmacy, pick-up of the drug, placement in the ward refrigerator                                                                                                                       |              | X        |            | X              |               |
| 3 – Patient preparation                        | Undressing-dressing, parameters measurement (temperature, blood pressure, heart rate, etc.), possible visit, seating on chair/bed, possible pre-dressing, disinfection, and venous access                          | X            | X        | X          | X              |               |
| 4 – Drug preparation                           | Taking, dilution, visual inspection                                                                                                                                                                                | X            | X        | X          | X              |               |
| 5 – Drug infusion                              | Total infusion length                                                                                                                                                                                              | X            |          | X          |                |               |
| 5.1 – Drug infusion—Active time*               | Infusion set attachment. Outflow connection to the catheter needle, other active time dedicated to the patient during the infusion for routine control or upon request                                             |              | X        |            |                |               |
| 6 – Post-infusion tasks                        | Intravenous flushing, set removal, dressing, clearing of infusion chair/bed (if monitoring elsewhere)                                                                                                              | X            | X        | X          |                | X             |
| 7 – Monitoring                                 | The total time between post-infusion steps and when the patient leaves the MS unit                                                                                                                                 | X            |          | X          |                | X             |
| 7.1 – Monitoring—Active Time*                  | Accommodating the patient in the monitoring site (if different from the infusion site), additional active time dedicated to the patient during monitoring for routine check-ups or upon request, patient discharge |              | X        |            |                | X             |
| 8 – Infusion field cleaning and waste disposal | Cleaning of the infusion chair/bed, waste disposal, relocation of unused material. Please note: write down the armchair/bed among the materials used if unusable by other patients during cleaning                 |              | X        | X          |                | X             |

Online Resource 1. Splitting of the time spent for the procedure.

\* 5.1 e 7.1 activities, while being part of the patient time, are not added because already included in 5 and 7 activities, respectively.

H = hospital; HCP = healthcare professional
