# Supplementary material for: Intravenous or subcutaneous natalizumab in patients with relapsing–remitting multiple sclerosis: investigation on efficiency and savings—the EASIER study
Source: Springer Nature journal article supplement (doi:10.1007/s00415-023-11955-0), 2023-09-16
Supplement: MOESM2 [file 26050636]

## Intravenous or Subcutaneous Natalizumab in Patients with Relapsing Remitting Multiple Sclerosis: Investigation on Efficiency and Savings—The EASIER Study

Massimo Filippi<sup>1,2</sup>, Luigi Grimaldi<sup>3</sup>, Antonella Conte<sup>4,5,6</sup>, Rocco Totaro<sup>7</sup>, Maria Rosaria Valente<sup>8</sup>, Simona Malucchi<sup>9</sup>, Franco Granella<sup>10</sup>, Cinzia Cordioli<sup>11</sup>, Vincenzo Brescia Morra<sup>12</sup>, Chiara Zanetta<sup>1</sup>, Daria Perini<sup>13</sup>, Laura Santoni<sup>13</sup>; on behalf of the EASIER study working group

<sup>1</sup>Neurology Unit, Neurorehabilitation Unit, Neurophysiology Service, and Neuroimaging Research Unit, Division of Neuroscience, IRCCS San Raffaele Scientific Institute, Milan, Italy; <sup>2</sup>Vita-Salute San Raffaele University, Milan, Italy; <sup>3</sup>Multiple Sclerosis Center, Fondazione Istituto G. Giglio, Cefalù (PA), Italy; <sup>4</sup>Department of Human Neurosciences, Sapienza, University of Rome, Italy; <sup>5</sup>Multiple Sclerosis Center Policlinico Umberto I Hospital, Rome, Italy; <sup>6</sup>IRCCS Neuromed, Pozzilli (IS), Italy; <sup>7</sup>Demyelinating Disease Center, Department of Neurology, San Salvatore Hospital, L'Aquila, Italy; <sup>8</sup>Clinical Neurology, Santa Maria della Misericordia University Hospital and Department of Medicine, University of Udine, Udine, Italy; <sup>9</sup>SCDO Neurologia, S. Luigi Gonzaga University Hospital, Orbassano (TO), Italy; <sup>10</sup>Department of Medicine and Surgery, University Hospital of Parma, Parma, Italy; <sup>11</sup>Multiple Sclerosis Center, ASST Spedali Civili di Brescia, Montichiari Hospital (Brescia), Italy; <sup>12</sup>Multiple Sclerosis Clinical Care and Research Center, Federico II University Hospital—Department of Neuroscience (NSRO), Naples, Italy; <sup>13</sup>Biogen Italia, Milan, Italy

Corresponding author: Massimo Filippi, filippi.massimo@hsr.it

| Subjects/jobs    | Male (€) | Female (€) | Source                                                                                           |
|------------------|----------|------------|--------------------------------------------------------------------------------------------------|
| 14-19 y          | 11.61    | 11.17      | ISTAT 2018 [1], updated 2021                                                                     |
| 20-29 y          | 13.54    | 12.95      |                                                                                                  |
| 30-39 y          | 17.25    | 16.20      |                                                                                                  |
| 40-49 y          | 20.58    | 18.77      |                                                                                                  |
| 50-59 y          | 23.79    | 21.68      |                                                                                                  |
| 60+ y            | 29.52    | 24.82      |                                                                                                  |
| Upaid lost hour  | 2.31     | 3.25       | Usò del tempo 2013-2014 [1], spread over 16 hours/day                                            |
| Caretaker        | 7.84     |            | Mean between super B level for autonomous patients and super C/D for non-autonomous patients [2] |
| Maid/baby-sitter | 7.16     |            | Mean between super B level (baby-sitter) and B for housework [2]                                 |
| Volunteer        | 12.61    |            | Rapporto CNEL-ISTAT [3] updated 2021                                                             |

Online Resource 2. Time value: gross hourly wage.

### References

1. ISTAT (2019) Multiscopo sulle famiglie: uso del tempo - file per la ricerca. <https://www.istat.it/it/archivio/202520>. Accessed 23 Nov 2022
2. Ebilcoba. Nuovo contratto collettivo nazionale di lavoro colf e badanti. [https://www.inps.it/docallegatiNP/Mig/Allegati/701Nuovo\\_CCNL\\_colf\\_badanti\\_Ebilcoba.pdf](https://www.inps.it/docallegatiNP/Mig/Allegati/701Nuovo_CCNL_colf_badanti_Ebilcoba.pdf). Accessed 17 Nov 2022
3. CNEL, ISTAT (2011). La valorizzazione economica del lavoro volontario nel settore non profit. [https://www.redattoresociale.it/media/la\\_valorizzazione\\_economica\\_del\\_lavoro\\_volontario\\_nel\\_settore\\_non\\_profit\\_](https://www.redattoresociale.it/media/la_valorizzazione_economica_del_lavoro_volontario_nel_settore_non_profit_) Accessed 23 Nov 2022
