# Supplementary material for: Intravenous or subcutaneous natalizumab in patients with relapsing–remitting multiple sclerosis: investigation on efficiency and savings—the EASIER study
Source: Springer Nature journal article supplement (doi:10.1007/s00415-023-11955-0), 2023-09-16
Supplement: MOESM3 [file 26050636]

## Intravenous or Subcutaneous Natalizumab in Patients with Relapsing Remitting Multiple Sclerosis: Investigation on Efficiency and Savings—The EASIER Study

Massimo Filippi<sup>1,2</sup>, Luigi Grimaldi<sup>3</sup>, Antonella Conte<sup>4,5,6</sup>, Rocco Totaro<sup>7</sup>, Maria Rosaria Valente<sup>8</sup>, Simona Malucchi<sup>9</sup>, Franco Granella<sup>10</sup>, Cinzia Cordioli<sup>11</sup>, Vincenzo Brescia Morra<sup>12</sup>, Chiara Zanetta<sup>1</sup>, Daria Perini<sup>13</sup>, Laura Santoni<sup>13</sup>; on behalf of the EASIER study working group

<sup>1</sup>Neurology Unit, Neurorehabilitation Unit, Neurophysiology Service, and Neuroimaging Research Unit, Division of Neuroscience, IRCCS San Raffaele Scientific Institute, Milan, Italy; <sup>2</sup>Vita-Salute San Raffaele University, Milan, Italy; <sup>3</sup>Multiple Sclerosis Center, Fondazione Istituto G. Giglio, Cefalù (PA), Italy; <sup>4</sup>Department of Human Neurosciences, Sapienza, University of Rome, Italy; <sup>5</sup>Multiple Sclerosis Center Policlinico Umberto I Hospital, Rome, Italy; <sup>6</sup>IRCCS Neuromed, Pozzilli (IS), Italy; <sup>7</sup>Demyelinating Disease Center, Department of Neurology, San Salvatore Hospital, L'Aquila, Italy; <sup>8</sup>Clinical Neurology, Santa Maria della Misericordia University Hospital and Department of Medicine, University of Udine, Udine, Italy; <sup>9</sup>SCDO Neurologia, S. Luigi Gonzaga University Hospital, Orbassano (TO), Italy; <sup>10</sup>Department of Medicine and Surgery, University Hospital of Parma, Parma, Italy; <sup>11</sup>Multiple Sclerosis Center, ASST Spedali Civili di Brescia, Montichiari Hospital (Brescia), Italy; <sup>12</sup>Multiple Sclerosis Clinical Care and Research Center, Federico II University Hospital—Department of Neuroscience (NSRO), Naples, Italy; <sup>13</sup>Biogen Italia, Milan, Italy

Corresponding author: Massimo Filippi, filippi.massimo@hsr.it

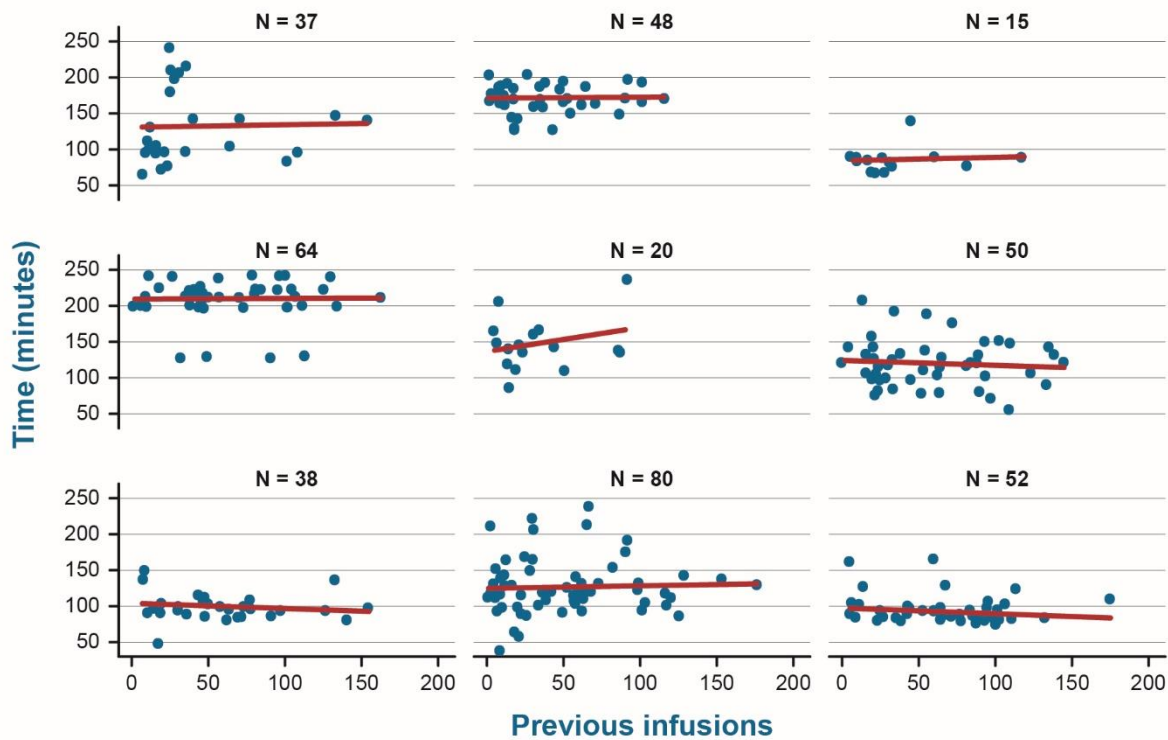

Online Resource 3. Patient total time per intravenous administration per center and estimations from the regression model. The dots represent each infusion according to their length and the number of previous infusions of the relevant patient. A slope, which is absent in these graphs, would indicate an association between the time of infusion and the number of previous infusions experienced by the patient.
