# Supplementary material for: Intravenous or subcutaneous natalizumab in patients with relapsing–remitting multiple sclerosis: investigation on efficiency and savings—the EASIER study
Source: Springer Nature journal article supplement (doi:10.1007/s00415-023-11955-0), 2023-09-16
Supplement: MOESM6 [file 26050636]

**Intravenous or Subcutaneous Natalizumab in Patients with Relapsing Remitting Multiple Sclerosis: Investigation on Efficiency and Savings—The EASIER Study**

Massimo Filippi<sup>1,2</sup>, Luigi Grimaldi<sup>3</sup>, Antonella Conte<sup>4,5,6</sup>, Rocco Totaro<sup>7</sup>, Maria Rosaria Valente<sup>8</sup>, Simona Malucchi<sup>9</sup>, Franco Granella<sup>10</sup>, Cinzia Cordioli<sup>11</sup>, Vincenzo Brescia Morra<sup>12</sup>, Chiara Zanetta<sup>1</sup>, Daria Perini<sup>13</sup>, Laura Santoni<sup>13</sup>; on behalf of the EASIER study working group

<sup>1</sup>Neurology Unit, Neurorehabilitation Unit, Neurophysiology Service, and Neuroimaging Research Unit, Division of Neuroscience, IRCCS San Raffaele Scientific Institute, Milan, Italy; <sup>2</sup>Vita-Salute San Raffaele University, Milan, Italy; <sup>3</sup>Multiple Sclerosis Center, Fondazione Istituto G. Giglio, Cefalù (PA), Italy; <sup>4</sup>Department of Human Neurosciences, Sapienza, University of Rome, Italy; <sup>5</sup>Multiple Sclerosis Center Policlinico Umberto I Hospital, Rome, Italy; <sup>6</sup>IRCCS Neuromed, Pozzilli (IS), Italy; <sup>7</sup>Demyelinating Disease Center, Department of Neurology, San Salvatore Hospital, L'Aquila, Italy; <sup>8</sup>Clinical Neurology, Santa Maria della Misericordia University Hospital and Department of Medicine, University of Udine, Udine, Italy; <sup>9</sup>SCDO Neurologia, S. Luigi Gonzaga University Hospital, Orbassano (TO), Italy; <sup>10</sup>Department of Medicine and Surgery, University Hospital of Parma, Parma, Italy; <sup>11</sup>Multiple Sclerosis Center, ASST Spedali Civili di Brescia, Montichiari Hospital (Brescia), Italy; <sup>12</sup>Multiple Sclerosis Clinical Care and Research Center, Federico II University Hospital—Department of Neuroscience (NSRO), Naples, Italy; <sup>13</sup>Biogen Italia, Milan, Italy

Corresponding author: Massimo Filippi, filippi.massimo@hsr.it

|                                   | <b>N. responders (%)</b> | <b>Mean (SD)</b> | <b>Range</b> |
|-----------------------------------|--------------------------|------------------|--------------|
| Round trip distance (km traveled) | 273 (92%)                | 73.6 (159.4)     | 1.5–2400     |
| Travel time (hours)               | 272 (92%)                | 1.6 (1.4)        | 0–10         |
| Means of transport                | 290 (98%)                |                  |              |
| • Private vehicle                 | 249 (86%)                |                  |              |
| • Public transport                | 31 (11%)                 |                  |              |
| • Taxi                            | 5 (2%)                   |                  |              |
| • Other                           | 5 (2%)*                  |                  |              |

Online Resource 6. Time and means of transport for IV procedure.

\*3 on foot and 2 by plane
